# Supplementary material for: Oxidative dehydrocoupling of N–H bonds using a redox-active main group superbase
Source: Royal Society of Chemistry journal article supplement (doi:10.1039/c1cc00053e), 2011-01-01
Supplement: c1cc00053e.pdf [file c1cc00053e.pdf]

ESI

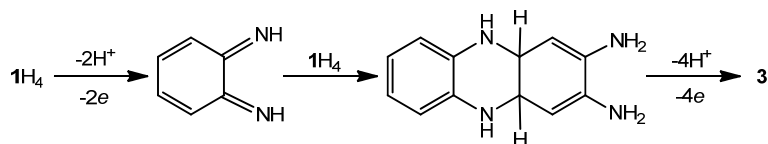

Scheme ESI-1 Mechanism of formation of **3** involving a Diel Alder type reaction.

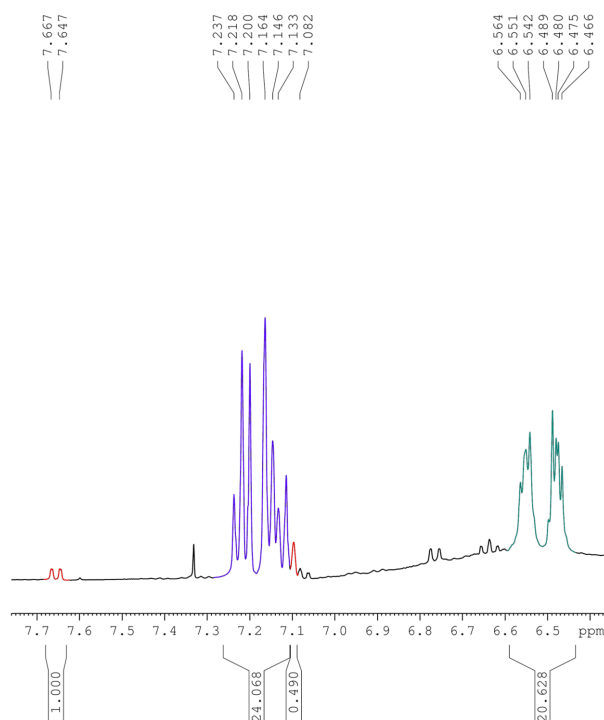

Figure ESI-1  $^1H$  NMR (500MHz, +25°C,  $CDCl_3$ ) of the crude mixture produced in the reaction of  $Sn(NMe_2)_2/nBuLi$  with *o*-phenylene diamine ( $1H_4$ ), after hydrolysis and extraction of the aqueous phase with  $CDCl_3$  at pH 8. (red **3**, blue **2H**, green  $1H_4$ ). The two multiplets at  $\delta$ 6.62 and 7.08 can be assigned to aniline, the byproduct in the formation of **2H** (see Scheme 3 in the text).

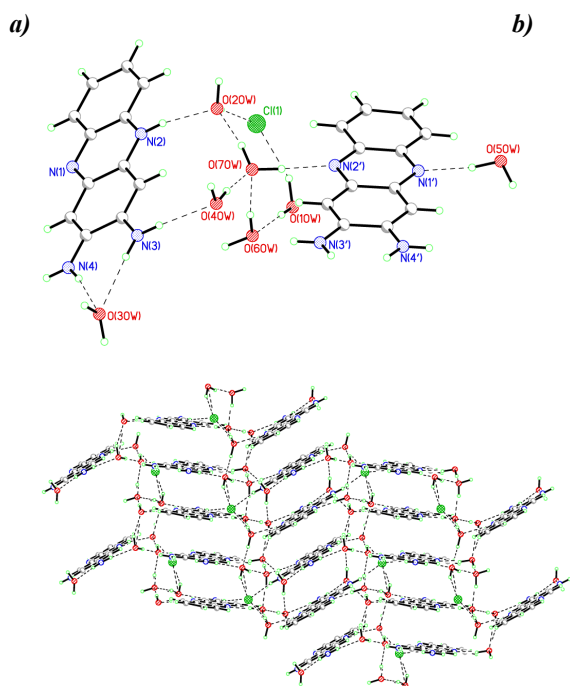

**Figure ESI-2** X-ray structure of  $[3][3H]^+Cl^- \cdot 7H_2O$ . *a)* the Asymmetric unit and *b)* the lattice structure.
